# Supplementary material for: RETRACTED ARTICLE:Endocrine disruptors induce perturbations in endoplasmic reticulum and mitochondria of human pluripotent stem cell derivatives
Source: PubMed Central journal article supplement (PMC5550485; doi:10.1038/s41467-017-00254-8), 2017-08-09
Supplement: 41467_2017_254_MOESM1_ESM.pdf [file 41467_2017_254_MOESM1_ESM.pdf]

File name: Supplementary Information

Description: Supplementary Figures and Supplementary Tables

# Supplementary Figure 1 Characterization of PBMC-derived iPSCs

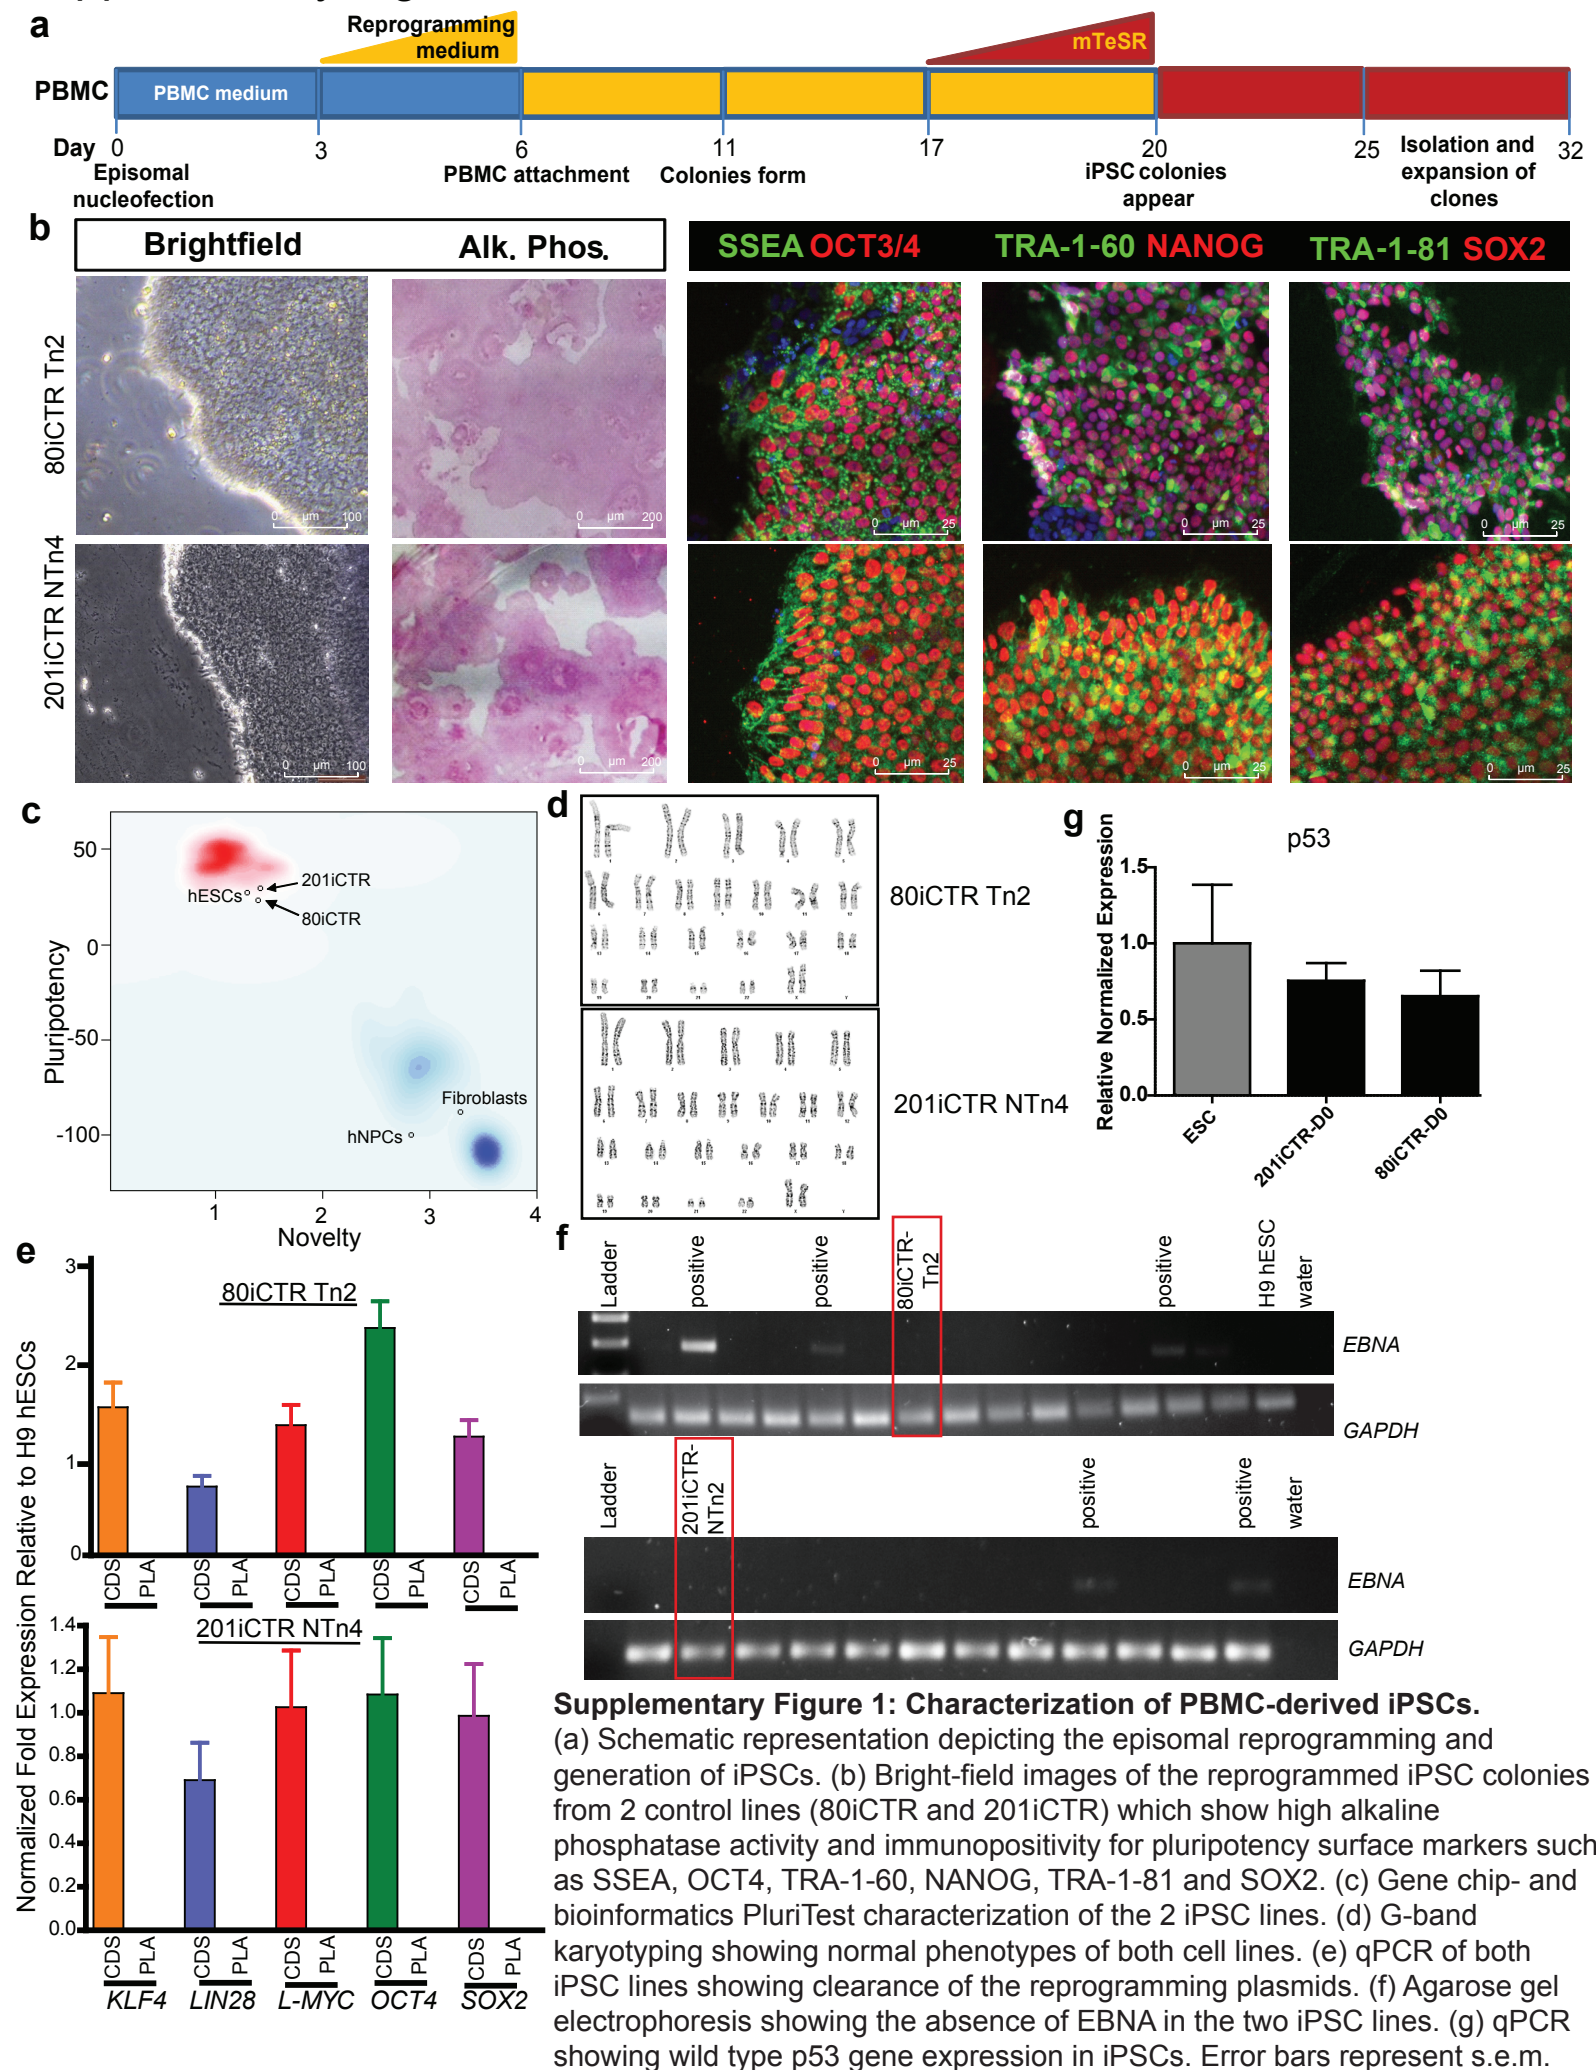

# Supplementary Figure 2 Cell viability (MTT assay) and DNA damage

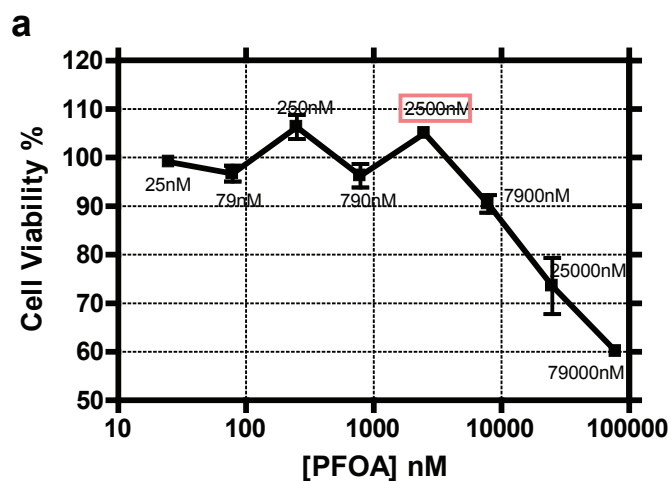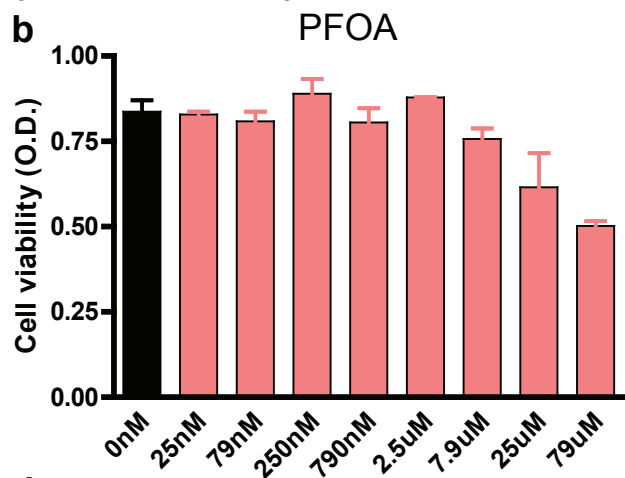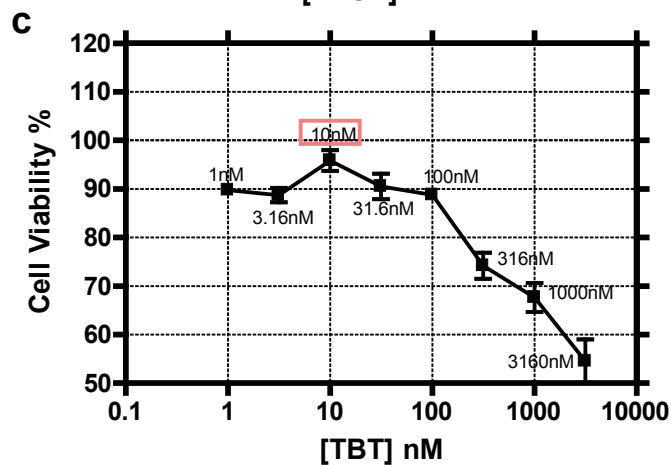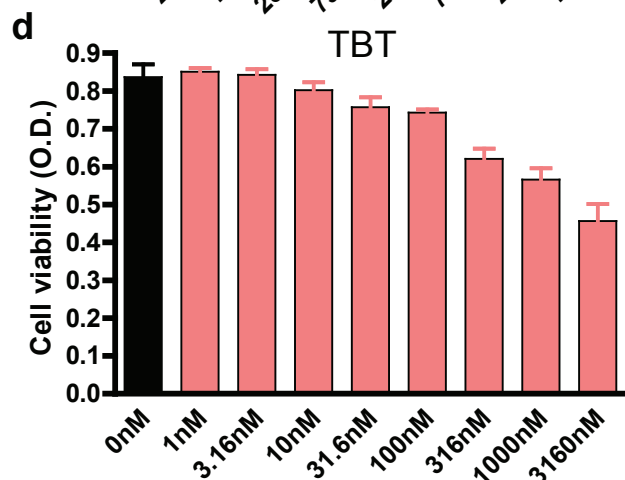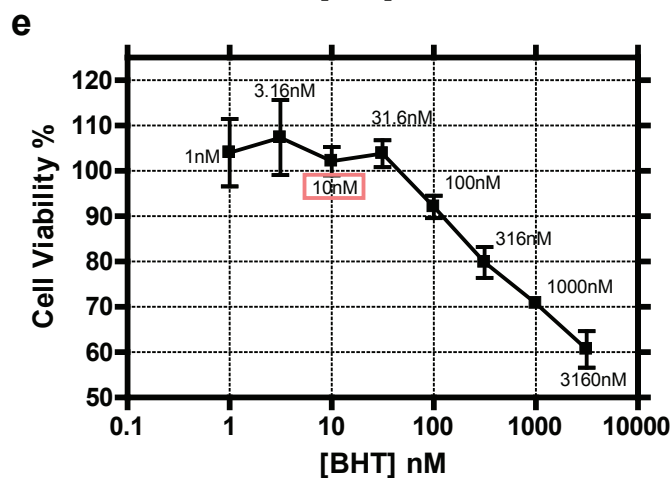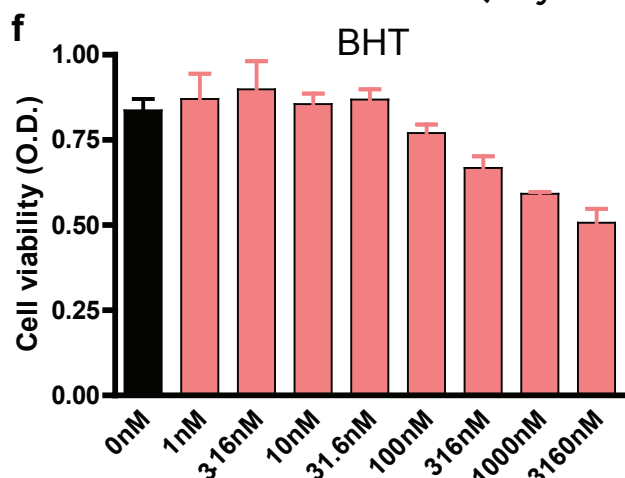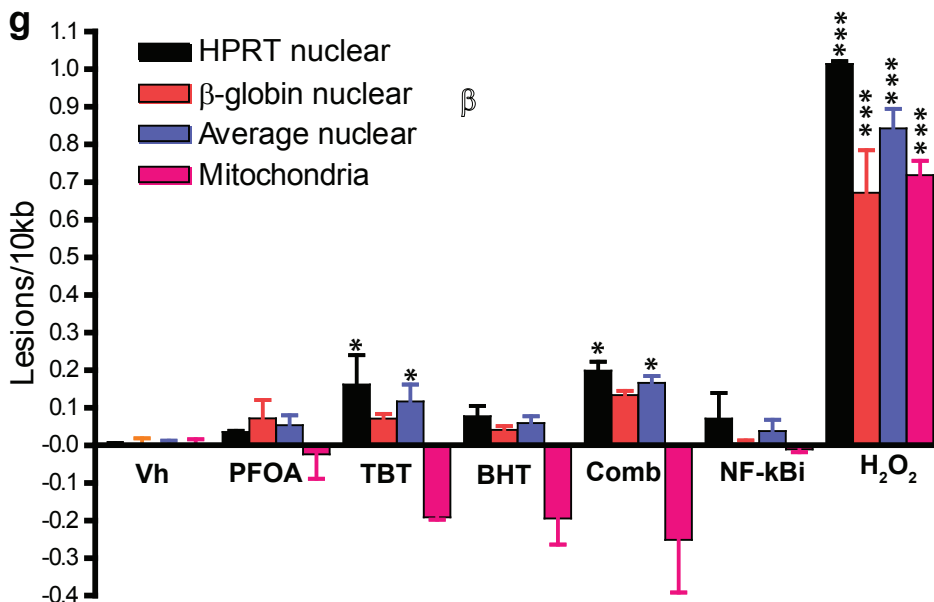

**Supplementary Figure 2: Cell viability (MTT assay) and DNA damage.** Cell viability semi-log dose response curves of (a) PFOA, (c) TBT and (e) BHT. The highlighted dose was used in this study. Bar graphs representing the optical density values of MTT assay on iHTNs treated with increasing doses of (b) PFOA, (d) TBT and (f) BHT. (g) Long-range PCR DNA damage showing lack of DNA lesions with EDC treatment. Note: A slight increase in nuclear HPRT lesions was observed with TBT and combination treatments. \*  $p < 0.05$ ; \*\*\*  $p < 0.001$ .  $n = 3$ . Error bars are defined as s.e.m.

### Supplementary Figure 3

EDC treatment does not affect differentiation efficiencies in iFGE and iHTN.

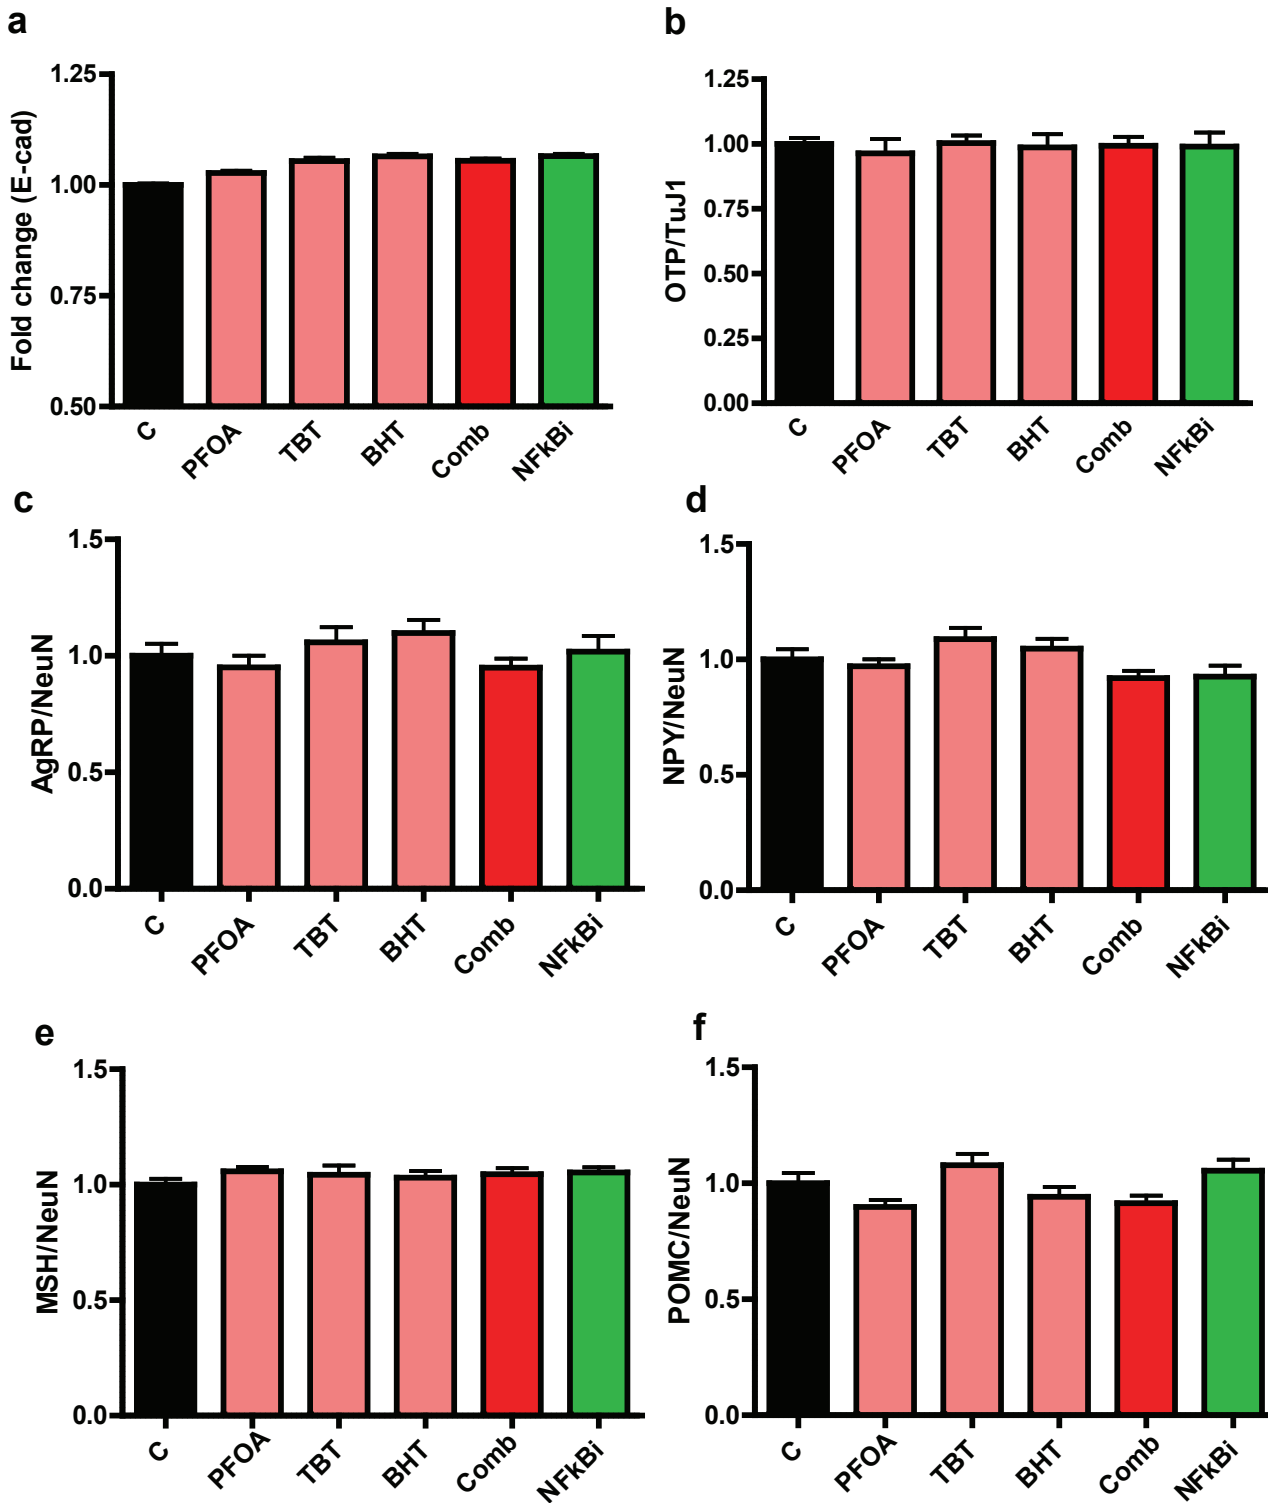

**Supplementary Figure 3: EDC treatment does not affect differentiation efficiencies in iFGE and iHTN.** Quantification of (a) E-cadherin positive cells in iFGE cultures and (b) OTP, (c) AgRP, (d) NPY, (e) MSH and (f) POMC positive neurons in iHTN cultures observed by immunocytochemistry shows no differences in the immune-positive cell numbers in control vs. EDC-treated cultures. The hypothalamic neuronal markers are normalized to pan-neuron markers,  $\beta$ III-tubulin (Tuj1) or neuronal nuclei (NeuN).  $n = 3$ . Error bars are defined as s.e.m.

# Supplementary Figure 4

# iFGE full immunoblots

**a** Phospho NF $\kappa$ B-p65 + Cox IV

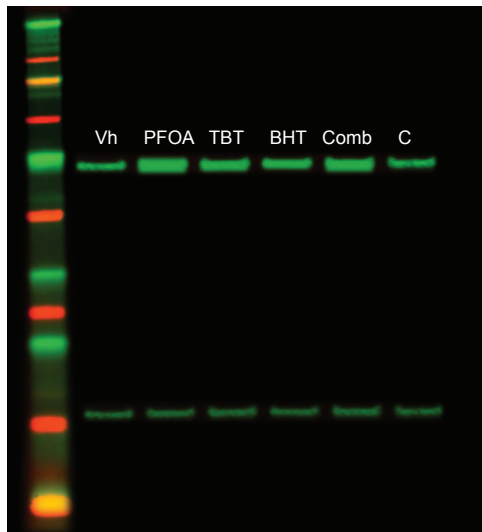

**b** Total NF $\kappa$ B-p65 + Cox IV

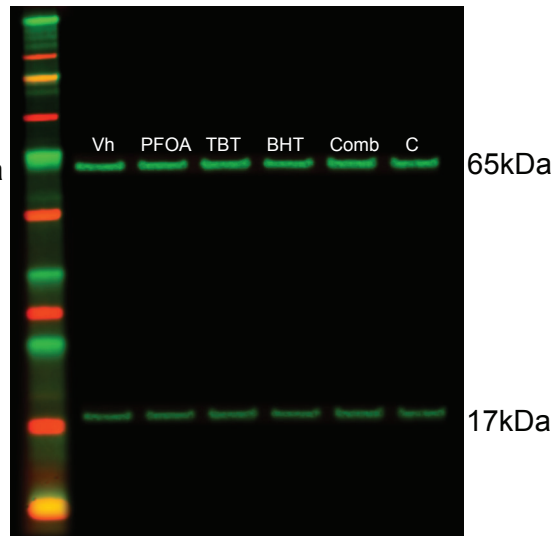

**c** p50/p105

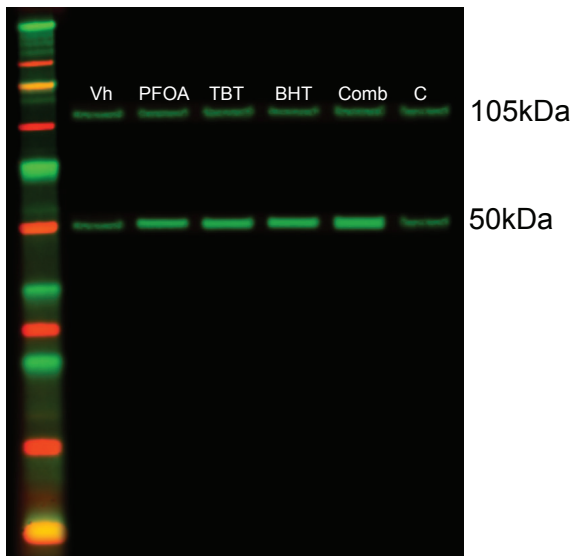

**d** p52/p100

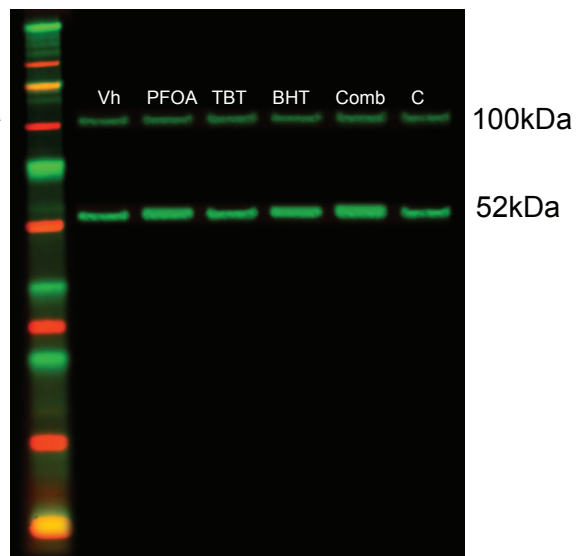

**Supplementary Figure 4: iFGE full immunoblots** (a-d) Full immunoblots of iFGE samples represented in Figure 4

# Supplementary Figure 5

## Intact p53 protein expression in differentiated iHTNs and full immunoblots

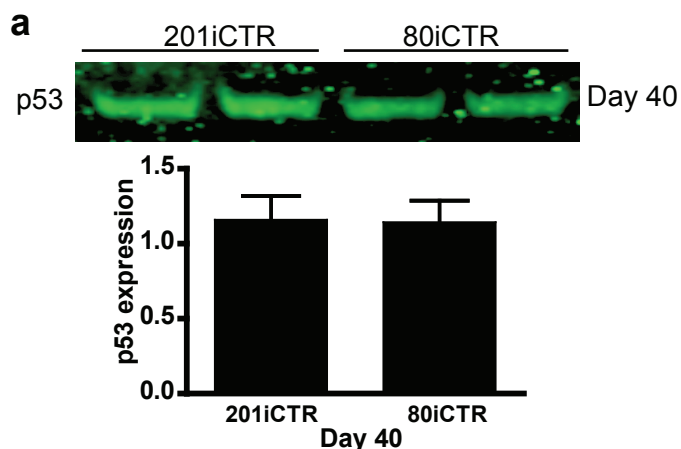

Full blots - iHTN; Figure 4

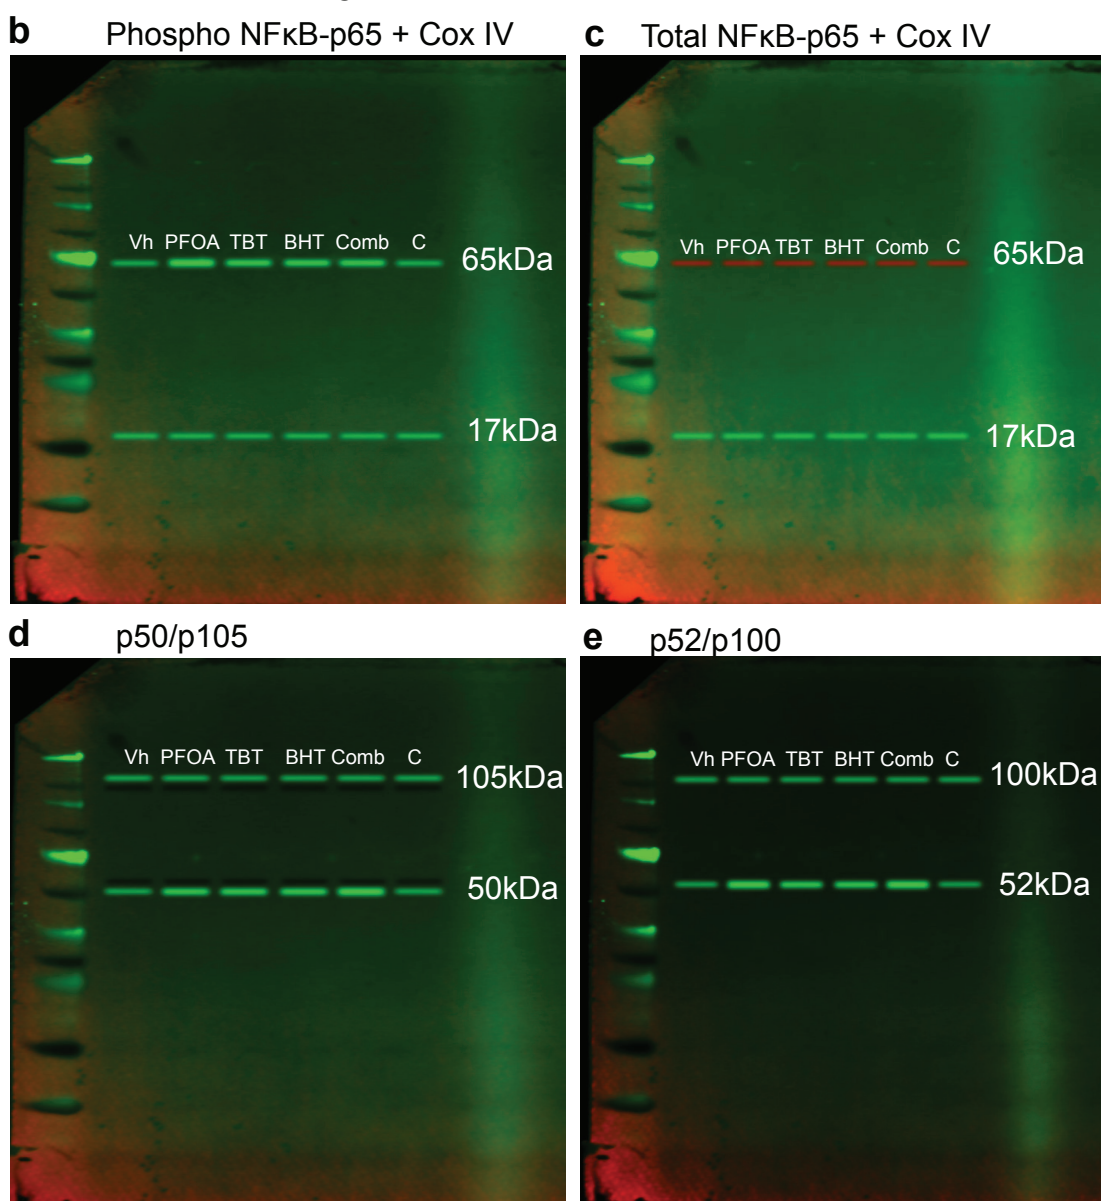

**Supplementary Figure 5: Intact p53 protein expression in differentiated iHTNs, and full iHTN immunoblots.** (a) Day 40 iHTNs showing expression of total p53 protein in 201iCTR and 80iCTR. (b-e) Original images of iHTN immunoblots represented in Figure 4

# Supplementary Figure 6

## Cox IV densitometry as measures of equal mitochondrial mass

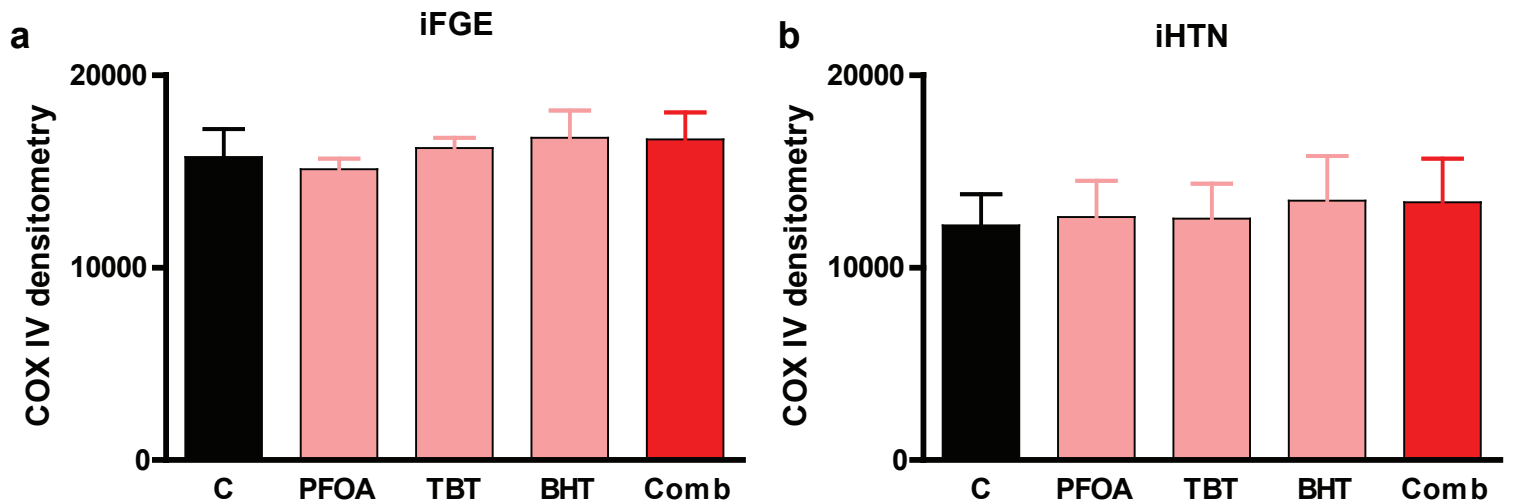

**Supplementary Figure 6: Cox IV densitometry as measures of equal mitochondrial mass.** Cox IV densitometry revealing equal amounts of cytochrome C oxidase 4 in (a) iFGEs and (b) iHTNs used as loading controls and as measures of mitochondrial mass in the samples employed. Error bars are defined as s.e.m.

# Supplementary Figure 7

## EDCs decrease expression of nuclear and mitochondrially-encoded genes in iFGEs

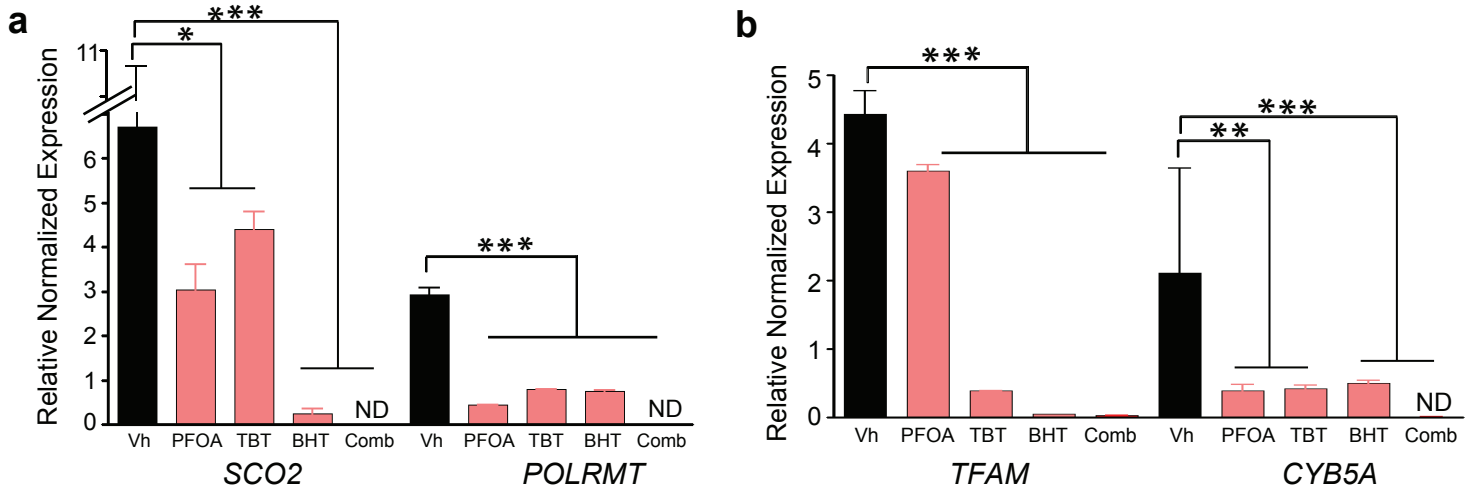

**Supplementary Figure 7: EDCs decrease expression of both nuclear and mitochondrially-encoded genes in iFGEs.** (a) RT-qPCR showing mRNA levels of nuclear-encoded genes, *SCO2* and *POLRMT*, involved in mitochondrial respiration after vehicle or EDC treatment in iFGEs. (b) mRNA levels of nuclear-encoded mitochondrial gene *TFAM* and mitochondrially-encoded gene, *CYB5A*, also decreased upon EDC treatment of iFGEs. \* $p < 0.05$ , \*\* $p < 0.01$ , \*\*\* $p < 0.001$ .  $n = 3$ . Error bars are defined as s.e.m.



# Supplementary Figure 8

## Bioinformatic determination of putative DNA binding sites for NFκB-p65 (RELA) and TP53

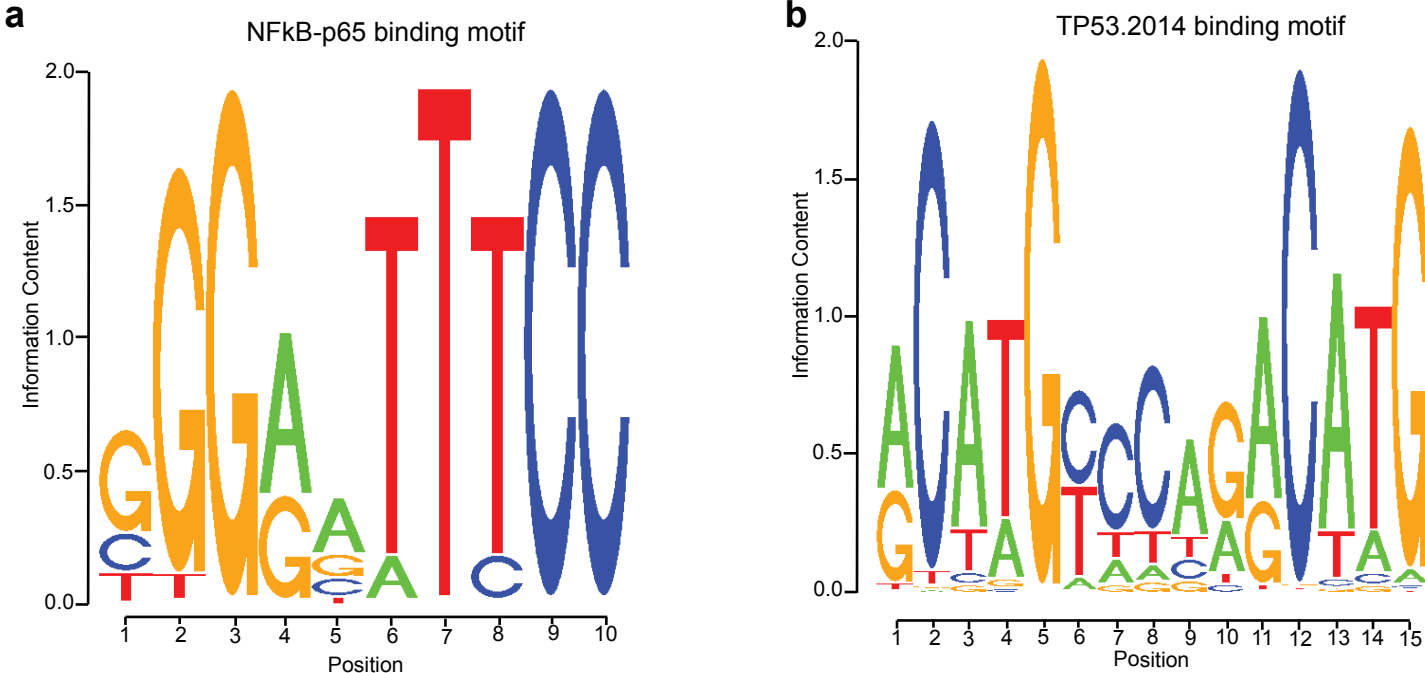

**Supplementary Figure 8: Bioinformatic determination of putative DNA binding sites for NFκB-p65 (RELA) and TP53.** DNA binding motif of (a) NFκB-p65 and (b) TP53 used in the bioinformatics analyses.

# Supplementary Figure 9

## EDC treatment does not affect orexigenic neurons but decreases anorexigenic proteins

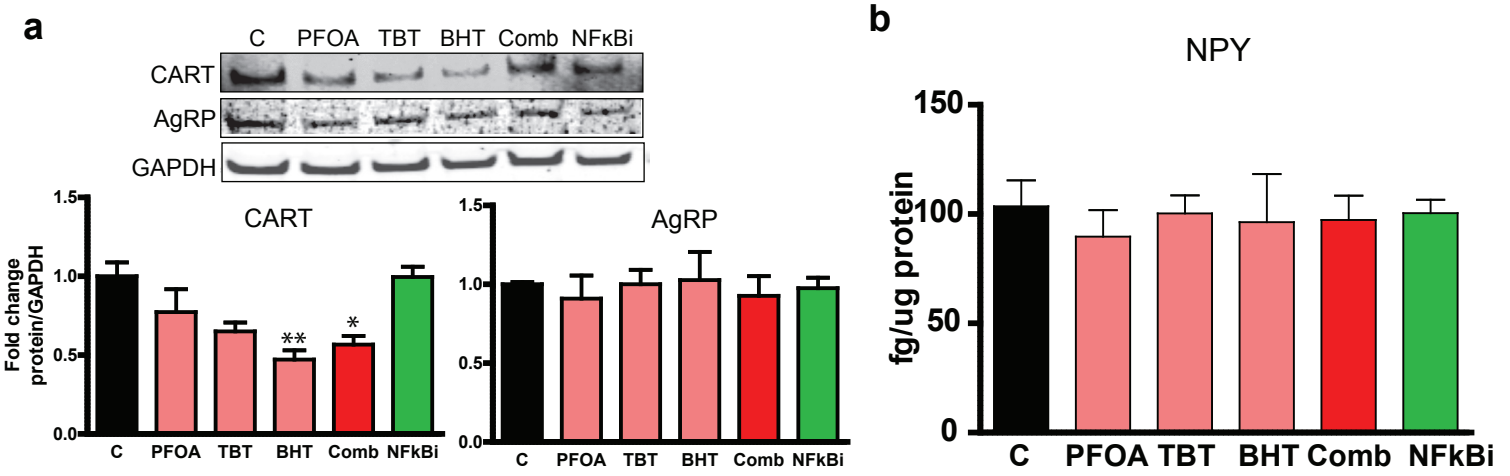

**Supplementary Figure 9: EDC treatment does not affect orexigenic neurons but decreases anorexigenic proteins.** (a) Western blots from iHTN shows decreases in CART peptide levels with EDC treatment and no changes in AgRP peptide levels, (b) no significant changes in NPY peptide secretion was observed as measured by ELISA; \* p<0.05, \*\*p<0.01. n = 3. Error bars are defined as s.e.m.

# Supplementary Figure 10

## NFκBi treatment does not rescue ER stress but attenuates phospho NFκB-p65 in iFGE

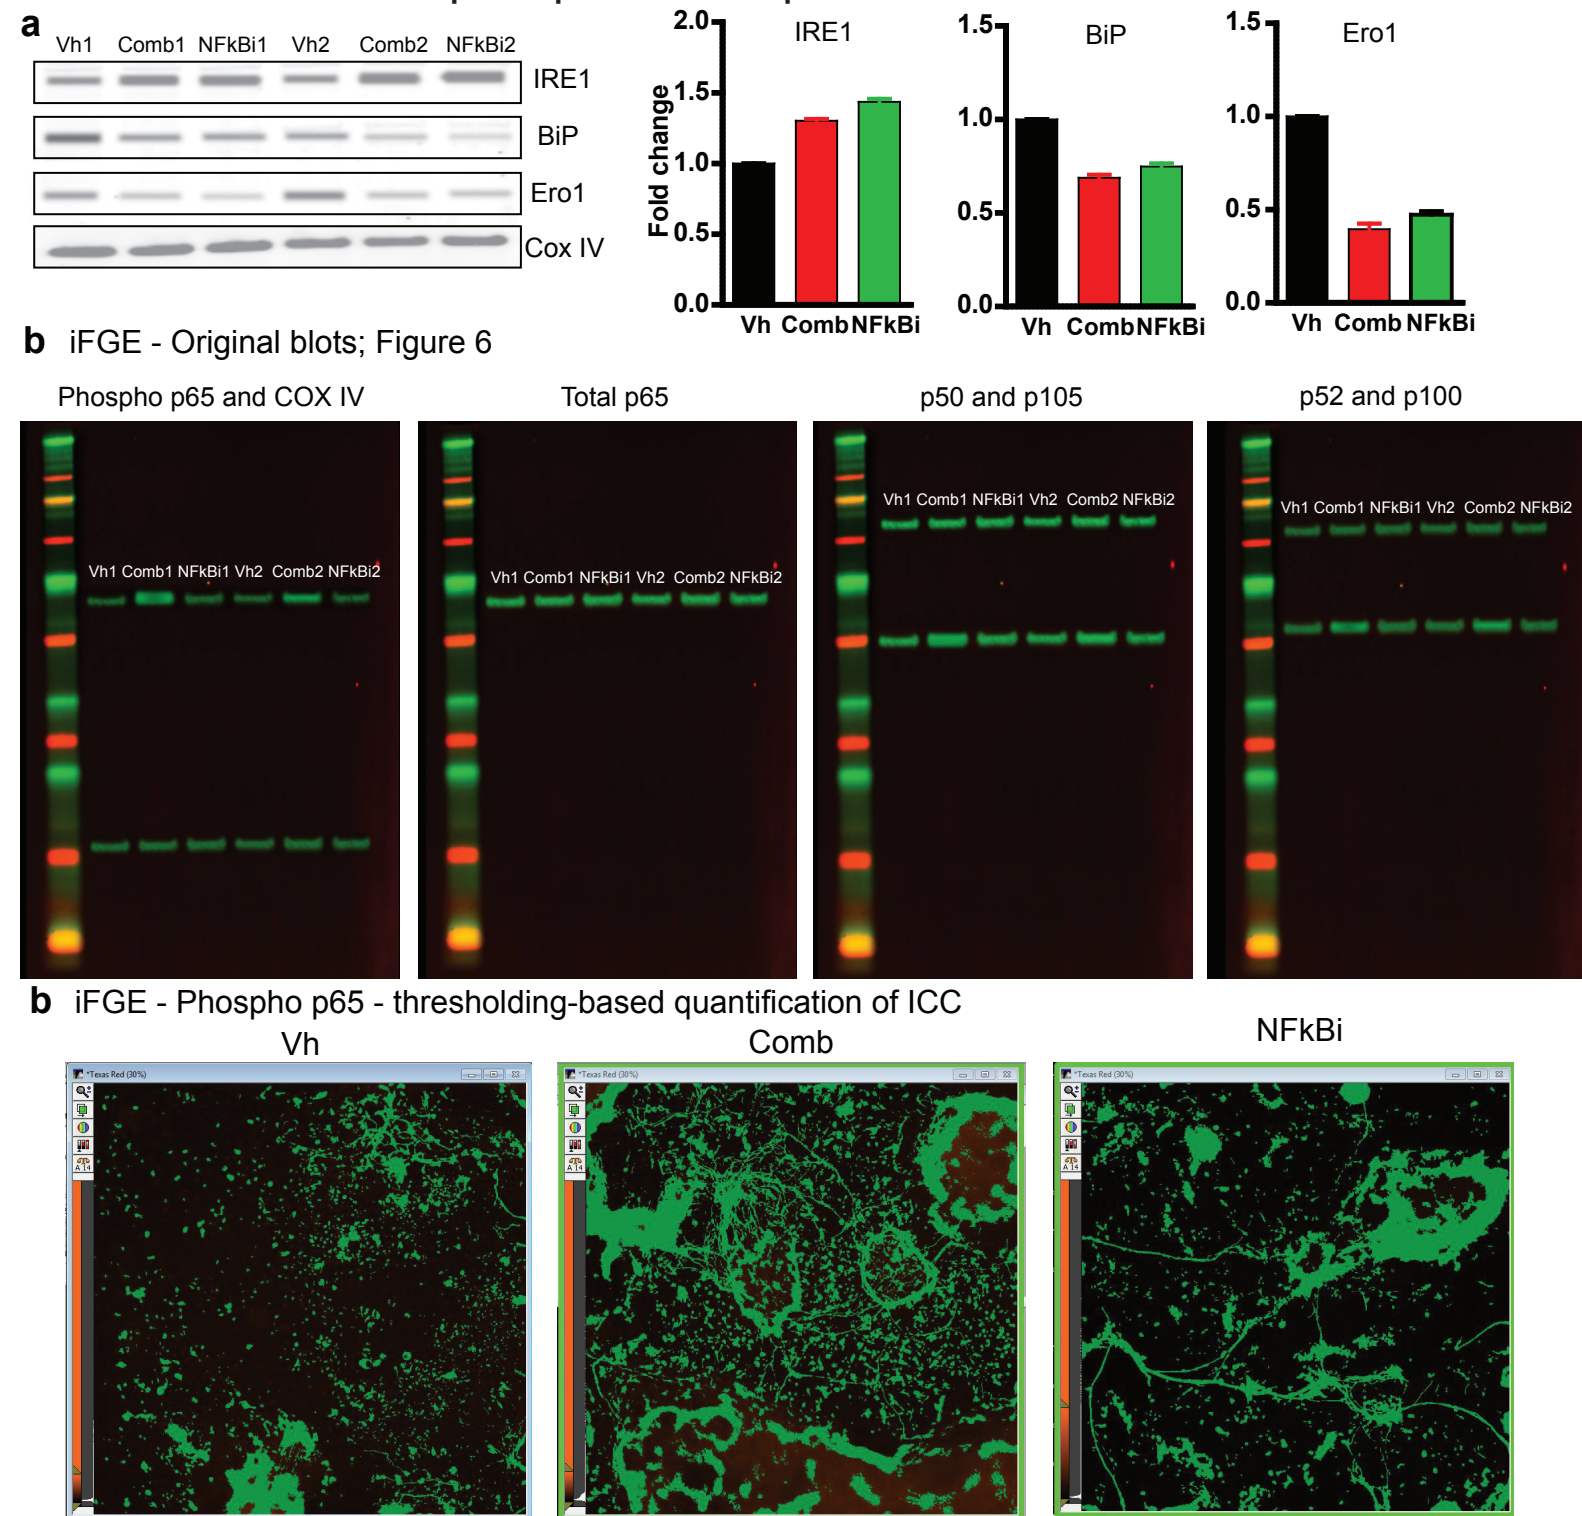

### Supplementary Figure 10: NFκBi treatment does not rescue ER stress but attenuates phospho NFκB-p65 in iFGE.

(a) Western blots in iFGEs showing no rescue of ER stress markers upon NF-κBi treatment compared to EDC-treated conditions, (b) Original images of iFGE blots represented in figure 6. 2 different cell lines were loaded in 6 lanes as Lane 1, 2 and 3 belonging to 80iCTR (Vh1, Comb1 and NFκBi1) and lanes 4, 5 and 6 from 201iCTR (Vh2, Comb2 and NFκBi2). (c) Quantification of immunocytochemistry staining of phospho NF-κB p65 in iFGEs using MetaXpress with the threshold tool to measure specific Phospho p65 signals. The panel represents images post thresholding in each of the treatments. n = 3. Error bars are defined as s.e.m.

# Supplementary Figure 11

## NFκBi treatment does not lower phospho p53 but attenuates phospho NFκB-p65 in iHTN

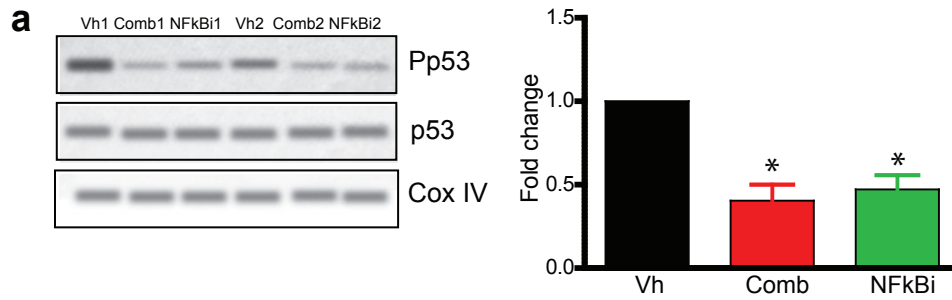

**b** iHTN - Original blots; Figure 6

Phospho p65 and COX IV

Total p65 and COX IV

p50 and p105

p52 and p100

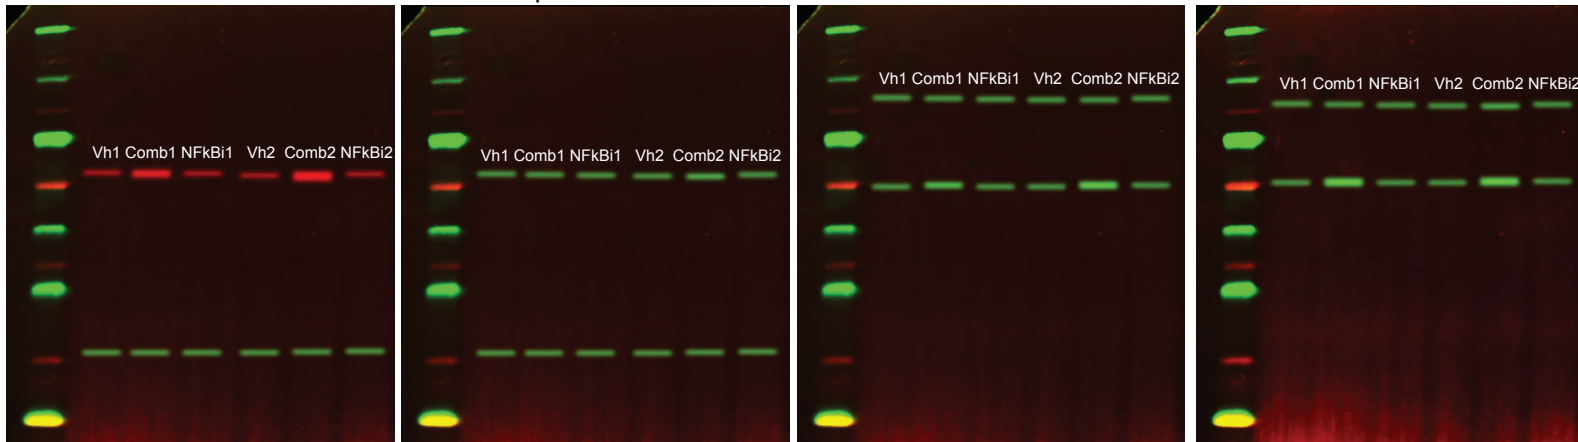

**c** iHTN - Phospho p65 - thresholding-based quantification of ICC

Vh

Comb

NFκBi

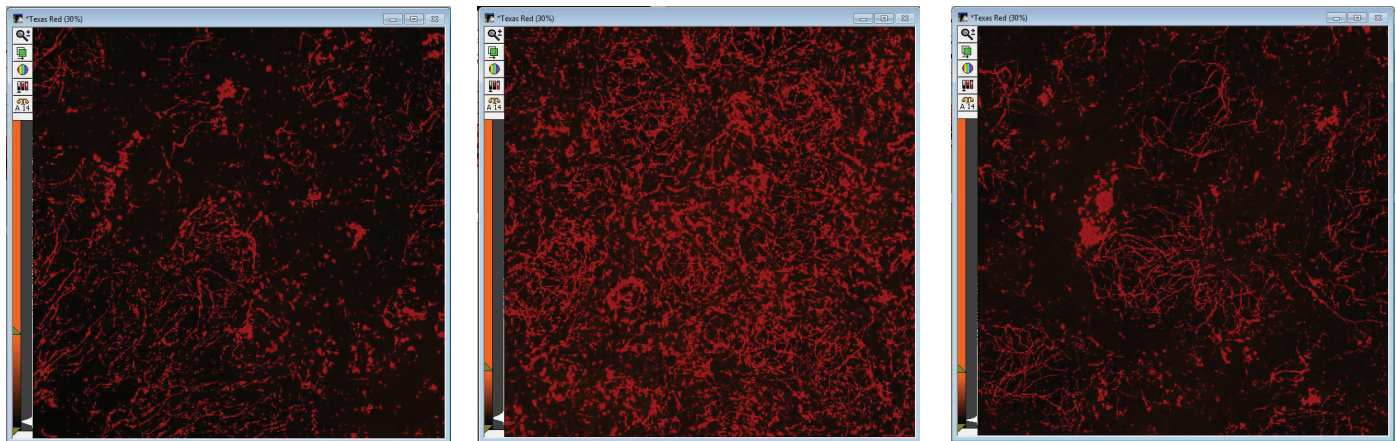

**Supplementary Figure 11: NFκBi treatment does not lower phospho p53 but attenuates phospho NFκB-p65 in iHTN.** (a) Western blot showing no rescue in phospho p53 (Ser15) levels upon NF-κBi treatment compared to EDC-treated conditions. \* $p < 0.05$ . (b) Original images of iHTN blots represented in figure 6. 2 different cell lines were loaded in 6 lanes as Lane 1, 2 and 3 belonging to 80iCTR (Vh1, Comb1 and NFκBi1) and lanes 4, 5 and 6 from 201iCTR (Vh2, Comb2 and NFκBi2). (c) Quantification of immunocytochemistry staining of phospho NF-κB p65 in iHTNs using MetaXpress with the threshold tool to measure specific Phospho p65 signals. The panel represents images post thresholding in each of the treatments.  $n = 3$ . Error bars are defined as s.e.m.

**Supplementary Table 1: Number putative of binding sites**

| Minimum Distance |                     | 60%       | 70%        | 80%         | 85%         |
|------------------|---------------------|-----------|------------|-------------|-------------|
| RELA             | SCO2                | 82        | 94         | 350         | -           |
|                  | TFAM                | 36        | 38         | 77          | -           |
|                  | POLRMT              | 79        | 157        | 1384        | 1947        |
|                  | CYB5A               | 131       | 696        | 1202        | 1202        |
|                  | <b>RELA</b>         | <b>18</b> | <b>426</b> | <b>958</b>  | <b>1674</b> |
|                  | <b>TP53</b>         | <b>81</b> | <b>958</b> | <b>1317</b> | -           |
|                  | Neg, min            | 3         | 4          | 4           | 4           |
|                  | Neg, lower quartile | 25        | 93.25      | 760.3       | 1889        |
|                  | Neg, median         | 39.5      | 208.5      | 1404        | -           |
|                  | HOX, min            | 1         | 14         | 45          | 246         |
|                  | HOX, lower quartile | 12.25     | 85.25      | 515.5       | 1399        |
|                  | HOX, median         | 40.5      | 153.5      | 1276        | -           |
|                  | IL1A                | 10        | 47         | 364         | 1981        |
|                  | IL1B                | 27        | 228        | 1980        | -           |
|                  | TNF                 | 67        | 243        | -           | -           |
| IL6              | 124                 | 596       | -          | -           |             |
| TP53.2014        | SCO2                | 34        | 822        | -           | -           |
|                  | TFAM                | 115       | 1863       | -           | -           |
|                  | POLRMT              | 104       | 1985       | -           | -           |
|                  | CYB5A               | 86        | 322        | -           | -           |
|                  | <b>RELA</b>         | <b>44</b> | <b>349</b> | -           | -           |
|                  | <b>TP53</b>         | <b>77</b> | <b>423</b> | -           | -           |
|                  | Neg, min            | 6         | 21         | 62          | -           |
|                  | Neg, lower quartile | 37        | 427.3      | -           | -           |
|                  | Neg, median         | 76        | 825.5      | -           | -           |
|                  | HOX, min            | 1         | 5          | 389         | -           |
|                  | HOX, lower quartile | 27.25     | 253        | -           | -           |
|                  | HOX, median         | 79        | 837.5      | -           | -           |
|                  | CDKN1A              | 13        | 188        | -           | -           |
|                  | GADD45A             | 24        | 1173       | -           | -           |

|         |     |      |   |   |
|---------|-----|------|---|---|
| GADD45B | 63  | 1235 | - | - |
| GADD45G | 64  | -    | - | - |
| PERP    | 67  | -    | - | - |
| BAX     | 102 | -    | - | - |

Supplementary Table 1: Identification of the number of putative binding sites of NFκB-p65 and TP53 binding motifs on genes of interest such as *SCO2*, *POLRMT*, *TFAM*, *CYB5A* and respective known genes regulated by NFκB-p65 (RELA) such as *IL1A*, *IL1B*, *TNF*, *IL6* or regulated by TP53 such as *GADD45A*, *GADD45B*, *GADD45G*, *PERP*, *BAX*.

**Supplementary Table 2: Minimum distance from transcription start sites (TSS)**

| Minimum Distance |                     | 60%       | 70%        | 80%         | 85%         |
|------------------|---------------------|-----------|------------|-------------|-------------|
| RELA             | SCO2                | 82        | 94         | 350         | -           |
|                  | TFAM                | 36        | 38         | 77          | -           |
|                  | POLRMT              | 79        | 157        | 1384        | 1947        |
|                  | CYB5A               | 131       | 696        | 1202        | 1202        |
|                  | <b>RELA</b>         | <b>18</b> | <b>426</b> | <b>958</b>  | <b>1674</b> |
|                  | <b>TP53</b>         | <b>81</b> | <b>958</b> | <b>1317</b> | -           |
|                  | Neg, min            | 3         | 4          | 4           | 4           |
|                  | Neg, lower quartile | 25        | 93.25      | 760.3       | 1889        |
|                  | Neg, median         | 39.5      | 208.5      | 1404        | -           |
|                  | HOX, min            | 1         | 14         | 45          | 246         |
|                  | HOX, lower quartile | 12.25     | 85.25      | 515.5       | 1399        |
|                  | HOX, median         | 40.5      | 153.5      | 1276        | -           |
|                  | IL1A                | 10        | 47         | 364         | 1981        |
|                  | IL1B                | 27        | 228        | 1980        | -           |
|                  | TNF                 | 67        | 243        | -           | -           |
| IL6              | 124                 | 596       | -          | -           |             |
| TP53.2014        | SCO2                | 34        | 822        | -           | -           |
|                  | TFAM                | 115       | 1863       | -           | -           |
|                  | POLRMT              | 104       | 1985       | -           | -           |
|                  | CYB5A               | 86        | 322        | -           | -           |
|                  | <b>RELA</b>         | <b>44</b> | <b>349</b> | -           | -           |
|                  | <b>TP53</b>         | <b>77</b> | <b>423</b> | -           | -           |
|                  | Neg, min            | 6         | 21         | 62          | -           |
|                  | Neg, lower quartile | 37        | 427.3      | -           | -           |
|                  | Neg, median         | 76        | 825.5      | -           | -           |
|                  | HOX, min            | 1         | 5          | 389         | -           |
|                  | HOX, lower quartile | 27.25     | 253        | -           | -           |
|                  | HOX, median         | 79        | 837.5      | -           | -           |
|                  | CDKN1A              | 13        | 188        | -           | -           |
|                  | GADD45A             | 24        | 1173       | -           | -           |

|  |         |     |      |   |   |
|--|---------|-----|------|---|---|
|  | GADD45B | 63  | 1235 | - | - |
|  | GADD45G | 64  | -    | - | - |
|  | PERP    | 67  | -    | - | - |
|  | BAX     | 102 | -    | - | - |

Supplementary Table 2: Identification of minimum distance in base pairs upstream of the transcription start sites of the DNA binding motifs of NFκB-p65 and TP53 on the indicated genes of interest. *HOX* genes were employed as neutral genes or genes that are not well-known in the literature to be controlled either by NFκB-p65 and TP53.



**Supplementary Table 3. List of antibodies**

| <b>Immunocytochemistry</b>                                                                                                                                       |               |                |                  |                 |
|------------------------------------------------------------------------------------------------------------------------------------------------------------------|---------------|----------------|------------------|-----------------|
| <b>Antibody</b>                                                                                                                                                  | <b>Source</b> | <b>Company</b> | <b>Catalog #</b> | <b>Dilution</b> |
| α-MSH                                                                                                                                                            | Rabbit        | Phoenix Pharma | H-43-01          | 1:250           |
| β-catenin                                                                                                                                                        | Rabbit        | Santa Cruz     | sc7199           | 1:500           |
| CART                                                                                                                                                             | Goat          | Santa Cruz     | sc18068          | 1:250           |
| CPE                                                                                                                                                              | Goat          | R&D Systems    | AF3587           | 1:250           |
| E-cadherin                                                                                                                                                       | Goat          | R&D Systems    | AF648            | 1:500           |
| GABA                                                                                                                                                             | Rabbit        | Sigma-Aldrich  | A2025            | 1:250           |
| Gastrin                                                                                                                                                          | Rabbit        | Dako           | A056801-2        | 1:250           |
| Ghrelin                                                                                                                                                          | Goat          | Santa Cruz     | sc10368          | 1:250           |
| NF-κB (pSer-311)                                                                                                                                                 | Mouse         | Santa Cruz     | sc166748         | 1:250           |
| NP-II                                                                                                                                                            | Goat          | Santa Cruz     | sc27093          | 1:250           |
| NPY                                                                                                                                                              | Rabbit        | MerckMillipore | AB9608           | 1:250           |
| OTP                                                                                                                                                              | Rabbit        | Genetex        | GTX119601        | 1:250           |
| Peptide YY                                                                                                                                                       | Rabbit        | Abcam          | ab22663          | 1:250           |
| Serotonin                                                                                                                                                        | Rabbit        | Immunostar     | 20080            | 1:250           |
| Somatostatin                                                                                                                                                     | Rabbit        | Santa Cruz     | sc13099          | 1:250           |
| Sox17                                                                                                                                                            | Mouse         | Novus          | 47996            | 1:250           |
| Sox2                                                                                                                                                             | Rabbit        | Stemgent       | 09-0024          | 1:500           |
| Synaptophysin                                                                                                                                                    | Mouse         | Santa Cruz     | sc17750          | 1:250           |
| TH                                                                                                                                                               | Mouse         | Immunostar     | 22941            | 1:250           |
| AgRP                                                                                                                                                             | Mouse         | Neuromics      | 15105            | 1:250           |
| POMC                                                                                                                                                             | Rabbit        | Santa Cruz     | Sc20148          | 1:250           |
| βIII-tubulin                                                                                                                                                     | Rabbit        | Biologend      | 845501           | 1:250           |
| NeuN                                                                                                                                                             | Mouse         | EMD Millipore  | MAB377           | 1:250           |
| Secondary (1:200): AlexaFluor (AF) 488 donkey anti-rabbit, AF 555 donkey anti-mouse, AF 594 donkey anti-mouse, AF 568 donkey anti-goat, AF 647 donkey anti-goat. |               |                |                  |                 |
| <b>Immunoblotting</b>                                                                                                                                            |               |                |                  |                 |
| COX IV                                                                                                                                                           | Rabbit        | Cell Signaling | 4850             | 1:2000          |
| NF-κB p65 (pSer-311)                                                                                                                                             | Mouse         | Santa Cruz     | sc166748         | 1:1000          |
| NF-κB p65 (RelA)                                                                                                                                                 | Rabbit        | Cell Signaling | 8242             | 1:1000          |
| NF-κB1 (p105/p50)                                                                                                                                                | Rabbit        | Cell Signaling | 12540            | 1:1000          |
| NF-κB2 (p100/p52)                                                                                                                                                | Rabbit        | Cell Signaling | 4882             | 1:1000          |
| AgRP                                                                                                                                                             | Mouse         | Neuromics      | 15105            | 1:1000          |

|                                                                                                                            |        |                |         |       |
|----------------------------------------------------------------------------------------------------------------------------|--------|----------------|---------|-------|
| CART                                                                                                                       | Goat   | Santa Cruz     | Sc18068 | 1:500 |
| Phospho p53 (Ser15)                                                                                                        | Rabbit | Cell Signaling | 9284T   | 1:500 |
| p53                                                                                                                        | Rabbit | Cell Signaling | 9282T   | 1:500 |
| IRE1 $\alpha$                                                                                                              | Rabbit | Cell Signaling | 3294    | 1:500 |
| Ero1                                                                                                                       | Rabbit | Cell Signaling | 3264    | 1:500 |
| BiP                                                                                                                        | Rabbit | Cell Signaling | 3177    | 1:500 |
| Secondary (1:2000): IRDye 800CW, donkey anti-rabbit, Li-Cor, 926-32213; IRDye 680LT, donkey anti-mouse, Li-Cor, 926-68022. |        |                |         |       |

**Supplementary Table 4. List of PCR Primers.**

| <b>Gene</b>       | <b>Primers</b>                                                                                            |
|-------------------|-----------------------------------------------------------------------------------------------------------|
| <i>AGRP</i>       | Forward 5' – GGATCTGTTGCAGGAGGCTCAG – 3'<br>Reverse 5' – TGAAGAAGCGGCAGTAGCACGT – 3'                      |
| <i>CDX2</i>       | Forward 5' – CTGGAGCTGGAGAAGGAGTTTC – 3'<br>Reverse 5' – ATTTAACCTGCCTCTCAGAGAGC – 3'                     |
| <i>GKN1</i>       | Forward 5' – CTTTCTAGCTCCTGCCCTAGC – 3'<br>Reverse 5' – GTTGCAGCAAAGCCATTTCC – 3'                         |
| <i>MC4R</i>       | Forward 5' – CTTATGATGATCCCAACCCG – 3'<br>Reverse 5' – GTAGCTCCTTGCTTGCATCC – 3'                          |
| <i>NKX2-1</i>     | Forward 5' – AACCAAGCGCATCCAATCTCAAGG – 3'<br>Reverse 5' – TGTGCCCAGAGTGAAGTTTGGTCT – 3'                  |
| <i>NPY</i>        | Forward 5' – GGTCTTCAAGCCGAGTTCTG – 3'<br>Reverse 5' – AACCTCATCACCAGGCAGAG – 3'                          |
| <i>OPRM1</i>      | Forward 5' – TGGTGGCAGTCTTCATCTTG – 3'<br>Reverse 5' – GATCATGGCCCTCTACTCCA – 3'                          |
| <i>PDX1</i>       | Forward 5' – CGTCCGCTTGTTCTCCTC – 3'<br>Reverse 5' – CCTTTCCCATGGATGAAGTC – 3'                            |
| <i>PGA5</i>       | Forward 5' – CCATCTTGCCTTCTCCCTCG – 3'<br>Reverse 5' – TCTGATGAGGGGGACCTTGT – 3'                          |
| <i>SOX2</i>       | Forward 5' – TTC ACA TGT CCC AGC ACT ACC AGA – 3'<br>Reverse 5' – TCA CAT GTG TGA GAG GGG CAG TGT GC – 3' |
| <i>TAS1R3</i>     | Forward 5' – ACGTCTGACAACCAGAAGCC – 3'<br>Reverse 5' – CAGTCCACACAGTCGTAGCA – 3'                          |
| <i>TFF1</i>       | Forward 5' – TGGAGGGACGTGATGGTAT – 3'<br>Reverse 5' – TGGAGGGACGTGATGGTAT – 3'                            |
| <i>TFF2</i>       | Forward 5' – CTGAGCCCCATAACAGGAC – 3'<br>Reverse 5' – ACGCACTGATCCGACTCTTG – 3'                           |
| <i>Large mito</i> | Forward 5' - TCTAAGCCTCCTTATTCGAGCCGA – 3'<br>Reverse 5' - TTTCATCATGCGGAGATGTTGGATGG – 3'                |
| <i>Small mito</i> | Forward 5' - CCC CAC AAA CCC CAT TAC TAA ACC CA – 3'<br>Reverse 5' - TTTCATCATGCGGAGATGTTGGATGG – 3'      |
| <i>β-globin</i>   | Forward 5' - CGA GTA AGA GAC CAT TGT GGC AG – 3'<br>Reverse 5' - GCA CTG GCT TAG GAG TTG GAC T – 3'       |
| <i>HPRT</i>       | Forward 5' - TGG GAT TAC ACG TGT GAA CCA ACC – 3'<br>Reverse 5' - GCT CTA CCC TCT CCT CTA CCG TCC – 3'    |
